# Supplementary material for: Tumor microenvironment and NIR laser dual-responsive release of berberine 9-O-pyrazole alkyl derivative loaded in graphene oxide nanosheets for chemo-photothermal synergetic cancer therapy
Source: Royal Society of Chemistry journal article supplement (doi:10.1039/d0tb00489h), 2020-01-01
Supplement: d0tb00489h1.pdf [file d0tb00489h1.pdf]

**Tumor Microenvironment and NIR Laser Dual Responsive Release of Berberine 9-O-pyrazole Alkyl Derivative Loaded in Graphene Oxide Nanosheets for Chemo-photothermal Synergetic Cancer Therapy**

Peifang Du<sup>a</sup>, Jianhua Yan<sup>b</sup>, Shuo Long<sup>a</sup>, Hongjie Xiong<sup>b</sup>, Nachuan Wen<sup>a</sup>, Shundong Cai<sup>b</sup>, Yirong Wang<sup>a</sup>, Dongming Peng<sup>c</sup>, Zhenbao Liu<sup>b,e,\*</sup>, Yanfei Liu<sup>a,\*\*</sup>

*a. Department of Pharmaceutical Engineering, College of Chemistry and Chemical Engineering, Central South University, Changsha, 410083, Hunan Province, P. R. China*

*b. Xiangya School of Pharmaceutical Sciences, Central South University, Changsha, 410013, Hunan Province, P. R. China*

*c. Department of Medicinal Chemistry, School of Pharmacy, Hunan University of Chinese Medicine, Changsha, 410208, Hunan Province, P. R. China*

*e. Molecular Imaging Research Center of Central South University, Changsha 410008, Hunan, P. R. China*

\*Corresponding author

\*\* Corresponding author

Corresponding author: Zhenbao Liu

Mailing address: Central South University, No.172, Tongzipo Road, Changsha, 410013, China

Tel.: +86-731 83992279; fax: +86-731 83992279

Mobile phone: 13723886533

E-mail: [zhenbaoliu@csu.edu.cn](mailto:zhenbaoliu@csu.edu.cn)

Corresponding author: Yanfei Liu

Mailing address: *Department of Pharmaceutical Engineering, School of Chemistry and Chemical Engineering, Central South University, Changsha, 410083, Hunan Province, P. R. China*

Tel.: +86-731 88879616; fax: +86-731 88879616

Mobile phone: 13017381167

E-mail: [liuyfcsu@163.com](mailto:liuyfcsu@163.com)

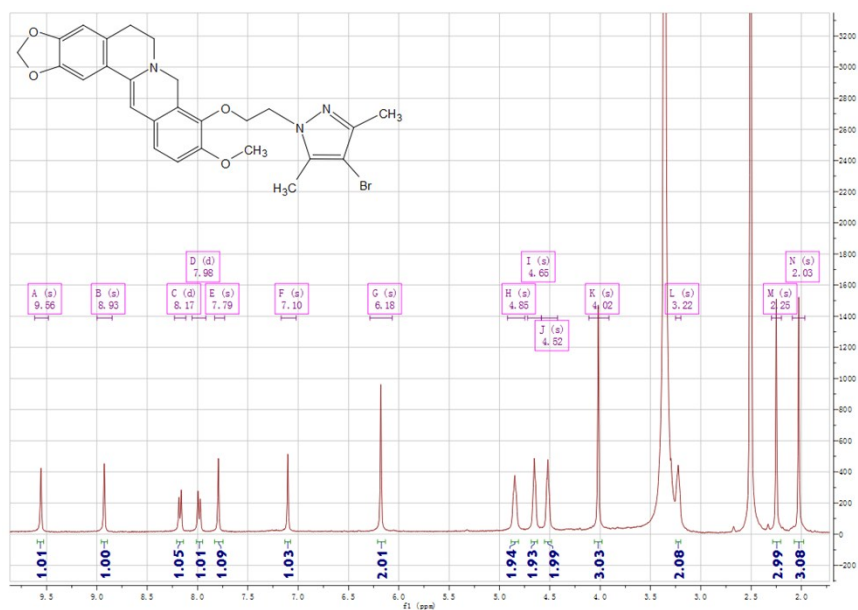

Figure S1. <sup>1</sup>H NMR spectrum of compound 3B

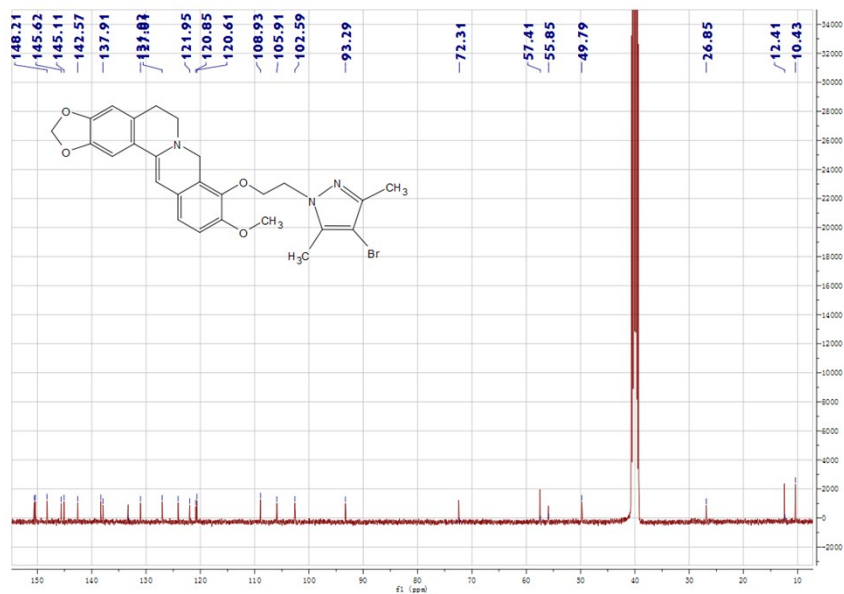

Figure S2. <sup>13</sup>C NMR spectrum of compound 3B

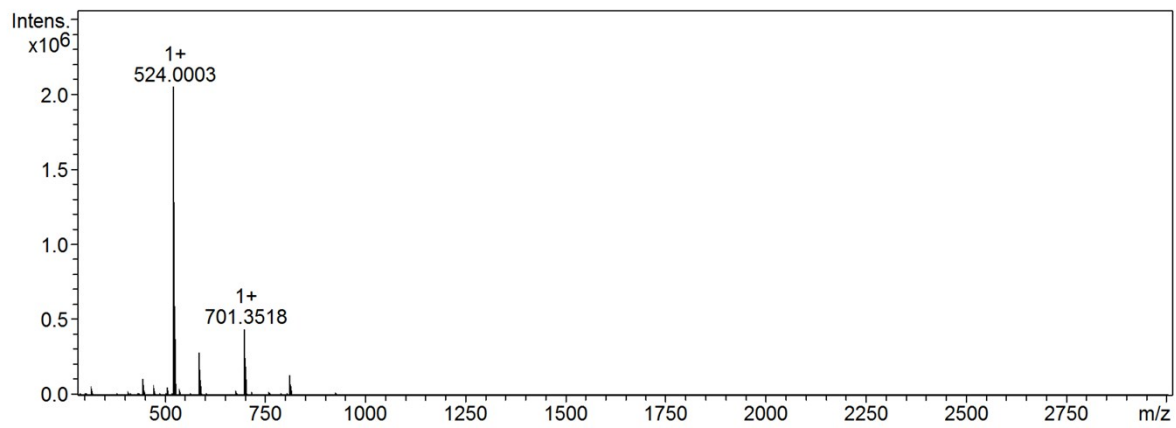

Figure S3. Mass spectrum of compound 3B

**Table S1.** Statistics on the numbers of A549 cells and L929 cells stained by the Calcein-AM/PI dyes.

|       |                        | Red | Green | Ratio (Red/Total) |
|-------|------------------------|-----|-------|-------------------|
|       | NIR Laser Only         | 10  | 490   | 0.0200            |
|       | GO                     | 1   | 738   | 0.0014            |
| A549  | AS1411-GO              | 3   | 585   | 0.0051            |
| Cells | GO/B3                  | 108 | 330   | 0.2466            |
|       | AS1411-GO/B3           | 165 | 339   | 0.3274            |
|       | AS1411-GO/B3+NIR Laser | 624 | 166   | 0.6895            |
|       | NIR Laser Only         | 10  | 345   | 0.0282            |
|       | GO                     | 3   | 655   | 0.0046            |
| L929  | AS1411-GO              | 22  | 308   | 0.0667            |
| Cells | GO/B3                  | 89  | 338   | 0.2084            |
|       | AS1411-GO/B3           | 123 | 367   | 0.2510            |
|       | AS1411-GO/B3+NIR Laser | 160 | 417   | 0.2773            |
